# Supplementary material for: Examining the Effects of Ambient Temperature on Pre-Term Birth in Central Australia
Source: PubMed Central journal article supplement (PMC5334701; doi:10.3390/ijerph14020147), 2017-02-04

# Supplementary Materials: Examining the Effects of Ambient Temperature on Pre-Term Birth in Central Australia

Supriya Mathew, Deepika Mathur, Anne B. Chang, Elizabeth McDonald, Gurmeet R. Singh, Darfiana Nur and Rolf Gerritsen

Table S1. Descriptive summary of temperature data.

| Meteorological variables | Complete Annual Series °C |         | Summer Season (December–February) °C |             |       |       |         |
|--------------------------|---------------------------|---------|--------------------------------------|-------------|-------|-------|---------|
|                          | Median                    | Minimum | Median                               | Percentiles |       |       | Maximum |
|                          |                           |         |                                      | 90th        | 95th  | 99th  |         |
| Maximum temperature      | 30                        | 7       | 36.70                                | 40.90       | 41.80 | 43.20 | 45      |
| Minimum temperature      | 14                        | -6      | 21.40                                | 25.90       | 27.30 | 29.50 | 31.70   |
| Average temperature      | 22.30                     | 5       | 29.10                                | 33          | 33.90 | 35.6  | 37.10   |

Source Bureau of Meteorology Alice springs airport station 15590 downloaded via <http://www.bom.gov.au/climate/data/> for the period 1986–2013.

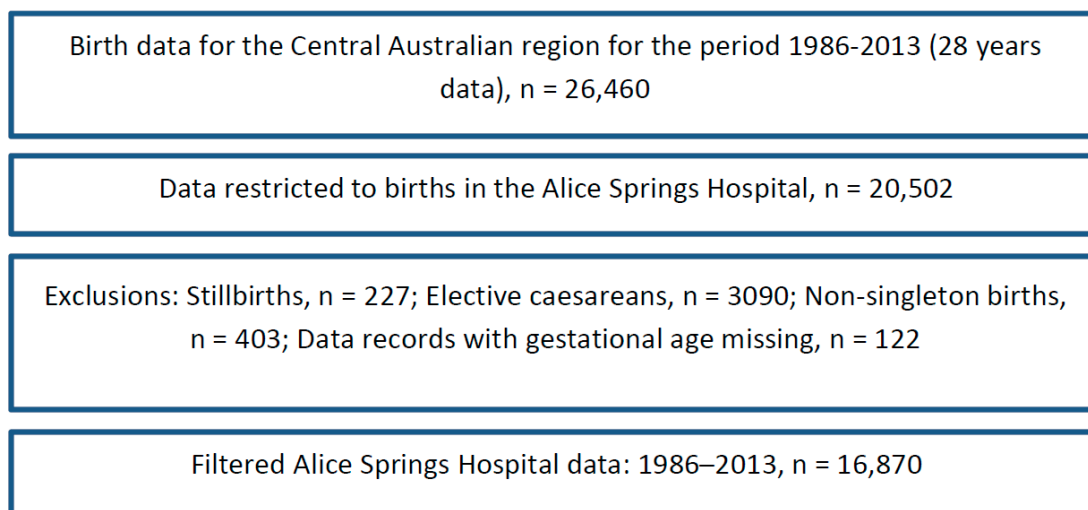

Figure S1. Block diagram showing how the final dataset was obtained from the original source (Department of Health Gains Planning Unit, NT Department of Health).

Table S2. Descriptive summary of the Alice Springs Hospital data used for analyses.

| Data Characteristics             | ASH Data Used n = 16,870 | ASH Pre Term Births n = 1401 |
|----------------------------------|--------------------------|------------------------------|
| Sex                              | Male                     | 729                          |
|                                  | Female                   | 671                          |
|                                  | Unknown                  | 1                            |
| Birth weight (Average in kg)     | 3.30                     | 2.48                         |
| Maternal age (Average in years)  | 26                       | 25                           |
| Indigenous status                | Indigenous               | 951                          |
|                                  | Non-indigenous           | 450                          |
|                                  | Not stated               | 0                            |
| Gestation age (Average in weeks) | 38.9                     | 34.3                         |

### S.1. Analysis of Birth Seasonality

Seasonal variation of monthly total births and monthly average of total births was checked using the plots of autocorrelations (see Figure S2). The Figure shows that data may contain polynomial trends, non-constant variation and seasonality. Using the autocorrelation function plots of seasonal differencing for each time series, we confirmed the non-stationarity and seasonality in the data. The seasonality is apparent for each series as the autocorrelation function is significant at lags = 12 with peaks in birth observed around March and April every year.

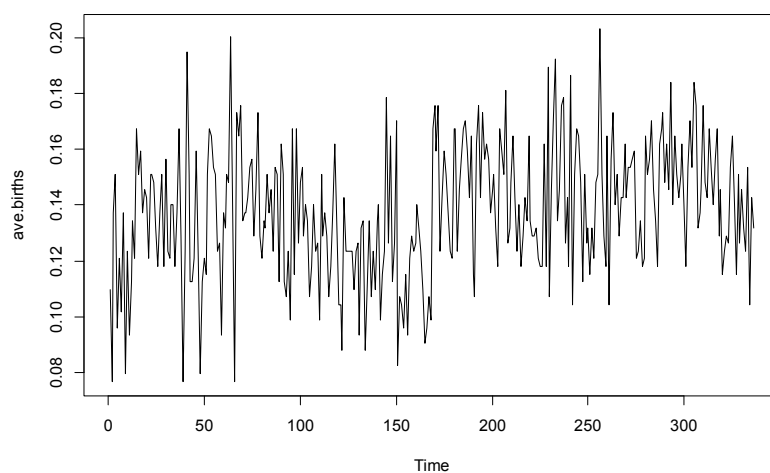

(a)

Series diff(ave.births, 12)

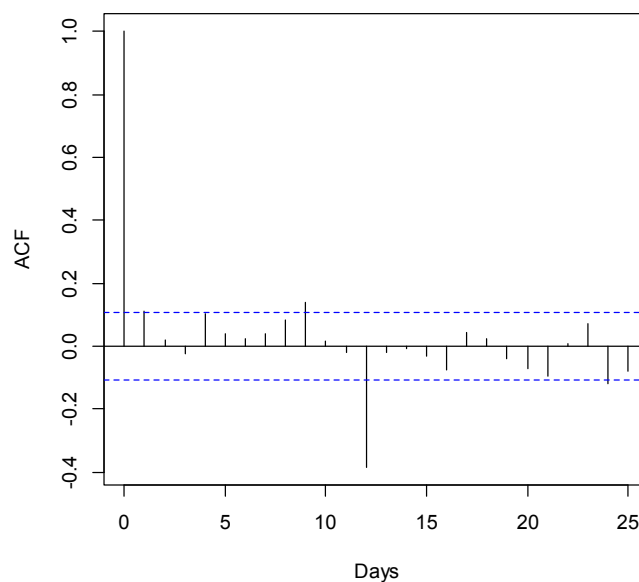

(b)

**Figure S2.** Monthly average of the total births (a) and the autocorrelation plot of seasonally differencing data (b).

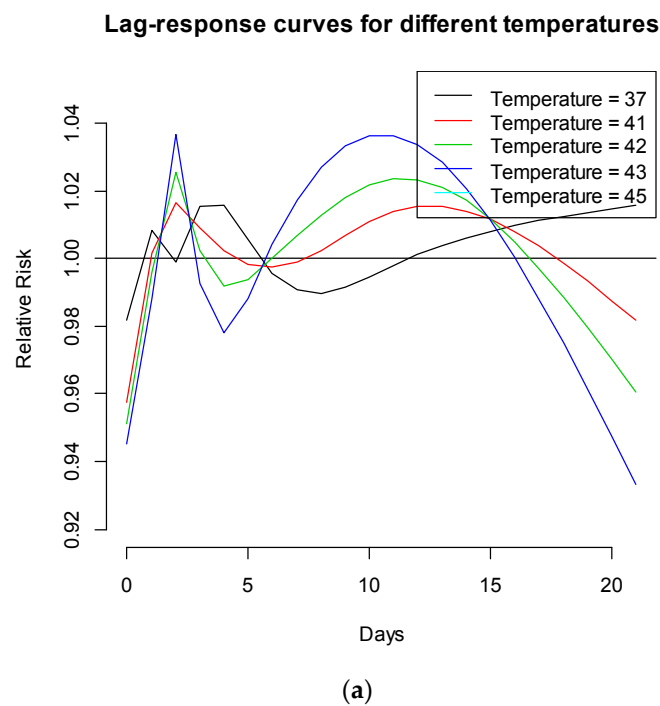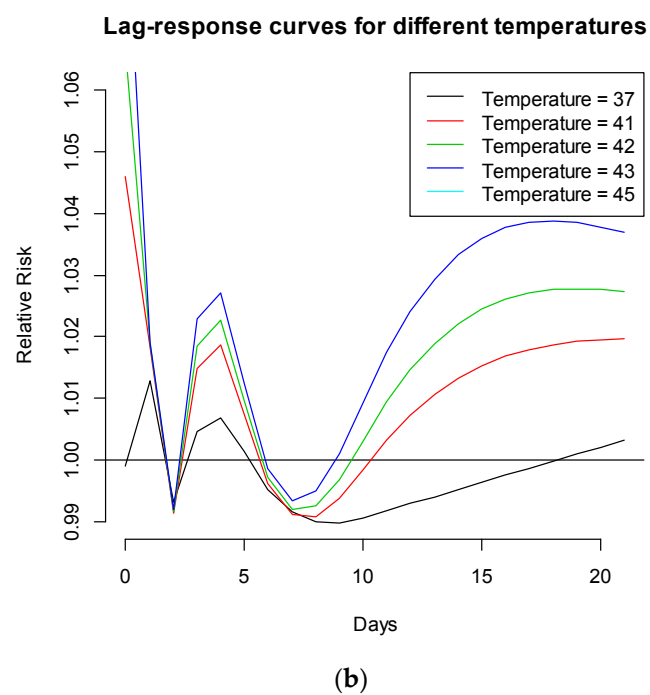

**Figure S3.** RR of preterm birth for the exposure to different maximum temperatures for Indigenous data (a) and non-Indigenous data (b). The median value of the whole temperature annual series (30 °C) is used as reference.

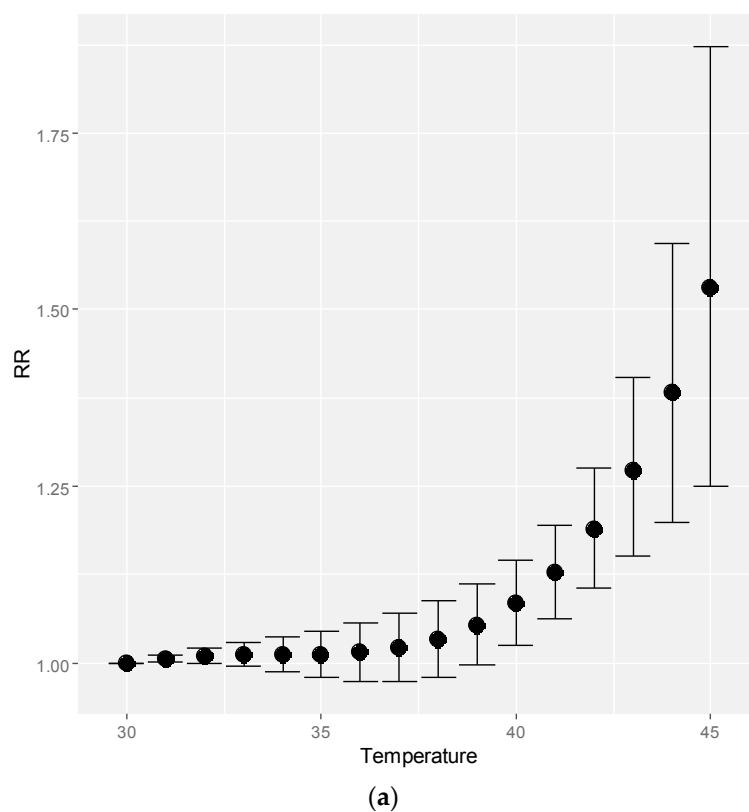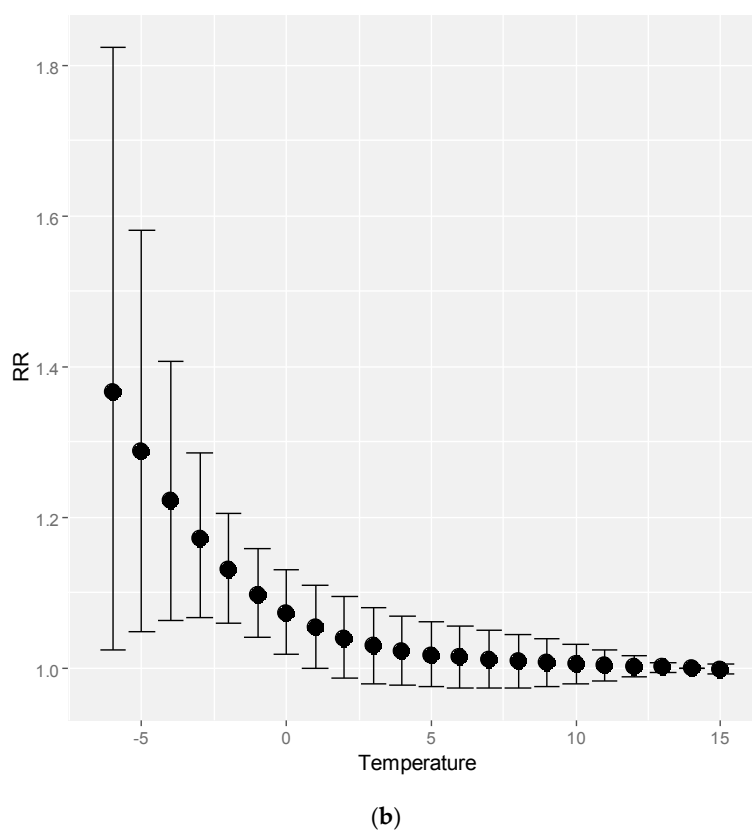

**Figure S4.** Cumulative relative risk estimates for 21 days with their 95% confidence intervals for different maximum (a) and minimum temperatures (b). The reference temperature is the median maximum temperature value of the summer season, 30 °C.

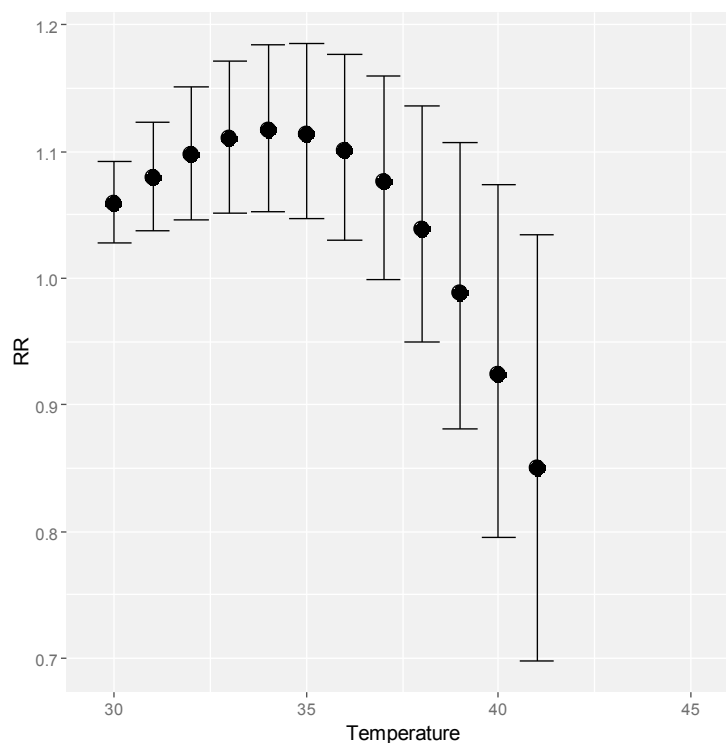

(a)

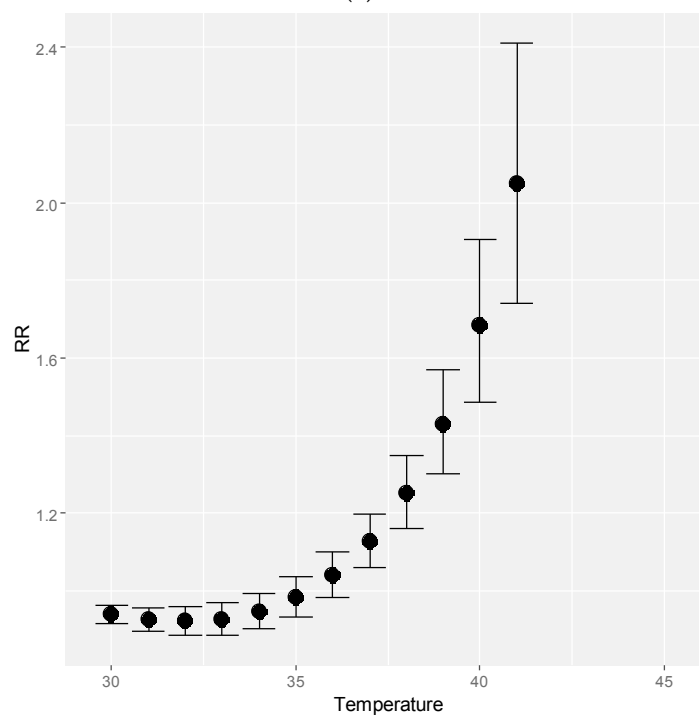

(b)

**Figure S5.** Cumulative relative risk estimates for 21 days with their 95% confidence intervals for different maximum temperatures using Indigenous data (a) and non-Indigenous data (b). The reference temperature is the median maximum temperature value of the summer season, 30 °C.

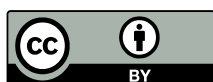

Supplement: ijerph-14-00147-s001.pdf [file ijerph-14-00147-s001.pdf]
